# Supplementary material for: Transcriptomics and Transposon Mutagenesis Identify Multiple Mechanisms of Resistance to the FGFR Inhibitor AZD4547
Source: Oxford University Press journal article supplement (doi:10.1158/0008-5472.can-18-0757), 2018-08-16
Supplement: 00085472can180757-sup-198397_2_supp_4922887_pcytgk.xlsx [file 00085472can180757-sup-198397_2_supp_4922887_pcytgk.xlsx]

## Sheet: Blad1
sample	tagmentation_id	rnaseq_id	treatment	treatment schedule	transplant
13SKA49	4540_1_13SKA49-1	3587_1_13SKA49	Vehicle	intermittent	tumor piece
13SKA57	4540_2_13SKA57-1	3587_2_13SKA57	Vehicle	intermittent	tumor piece
13SKA71	4540_3_13SKA71-1	3587_4_13SKA71	Vehicle	intermittent	tumor piece
13SKA72	4540_4_13SKA72-1	3587_5_13SKA72	AZD4547	intermittent	tumor piece
13SKA88	4540_5_13SKA88-1	3587_6_13SKA88	Vehicle	intermittent	tumor piece
13SKA92	4540_6_13SKA92-1	3587_7_13SKA92	AZD4547	intermittent	tumor piece
13SKA99	4540_7_13SKA99-1	3587_8_13SKA99	AZD4547	intermittent	tumor piece
13SKA106	4540_8_13SKA106-1	3587_9_13SKA106	AZD4547	intermittent	tumor piece
13SKA116	4540_9_13SKA116-1	3587_10_13SKA116	AZD4547	intermittent	tumor piece
13SKA121	4540_10_13SKA121-1	3587_11_13SKA121	AZD4547	intermittent	tumor piece
13SKA127	4540_11_13SKA127-1	3587_12_13SKA127	AZD4547	intermittent	tumor piece
13SKA133	4540_12_13SKA133-1	3587_13_13SKA133	AZD4547	intermittent	tumor piece
14SKA003	4540_13_14SKA003-1	3587_14_14SKA003	Vehicle	intermittent	tumor piece
14SKA022	4540_14_14SKA022-1	3587_15_14SKA022	Vehicle	intermittent	tumor piece
14SKA039	4540_15_14SKA039-1	3587_16_14SKA039	AZD4547	intermittent	tumor piece
14SKA46	4540_16_14SKA46-1	3587_17_14SKA46	AZD4547	intermittent	tumor piece
14SKA54	4540_17_14SKA54-1	3587_18_14SKA54	Vehicle	intermittent	tumor piece
14SKA63	4540_18_14SKA63-1	3587_19_14SKA63	Vehicle	intermittent	tumor piece
14SKA69	4540_19_14SKA69-1	3587_20_14SKA69	AZD4547	intermittent	tumor piece
14SKA72	4540_20_14SKA72-1	3587_21_14SKA72	Vehicle	intermittent	tumor piece
14SKA74	4540_21_14SKA74-1	3587_22_14SKA74	AZD4547	intermittent	tumor piece
14SKA121	4540_22_14SKA121-1	3587_23_14SKA121	AZD4547	intermittent	tumor piece
15SKA120	4540_23_15SKA120-1	3587_24_15SKA120	Vehicle	continuous	tumor cells
15SKA133	4540_24_15SKA133-1	3587_25_15SKA133	Vehicle	continuous	tumor cells
15SKA160	4540_25_15SKA160-1	3587_26_15SKA160	Vehicle	continuous	tumor cells
15SKA178	4540_26_15SKA178-1	3587_27_15SKA178	AZD4547	continuous	tumor cells
15SKA192	4540_27_15SKA192-1	3587_28_15SKA192	AZD4547	continuous	tumor cells
15SKA193	4540_28_15SKA193-1	3587_29_15SKA193	AZD4547	continuous	tumor cells
15SKA201	4540_29_15SKA201-1	3587_30_15SKA201	AZD4547	continuous	tumor cells
15SKA207	4540_30_15SKA207-1	3587_31_15SKA207	AZD4547	continuous	tumor cells
15SKA209	4540_31_15SKA209-1	3587_32_15SKA209	AZD4547	continuous	tumor cells
12SKA94	4540_32_12SKA94	2223_1_12SKA94	Vehicle	continuous	tumor piece
12SKA98	4540_33_12SKA98	2223_2_12SKA98	Vehicle	continuous	tumor piece
12SKA99-primary-tumor	4540_34_12SKA99-primary-tumor	2223_3_12SKA99_primary	Vehicle	continuous	tumor piece
12SKA103	4540_35_12SKA103	2223_5_12SKA103	AZD4547	continuous	tumor piece
12SKA116	4540_36_12SKA116	2223_6_12SKA116	AZD4547	continuous	tumor piece
12SKA121	4540_37_12SKA121	2223_7_12SKA121	AZD4547	continuous	tumor piece
12SKA122	4540_38_12SKA122	2223_8_12SKA122	AZD4547	continuous	tumor piece
12SKA128	4540_39_12SKA128	2223_9_12SKA128	AZD4547	continuous	tumor piece
12SKA129	4540_40_12SKA129	2223_10_12SKA129	AZD4547	continuous	tumor piece
13SKA4	4540_41_13SKA4	2223_11_13SKA4	AZD4547	continuous	tumor piece
13SKA19	4540_42_13SKA19	2223_12_13SKA19	AZD4547	continuous	tumor piece
11KOU023	4540_43_11KOU023	1566_10_11KOU023	Donor	none	tumor piece
11KOU023-2	4540_44_11KOU023		Donor	none	tumor piece
