# Supplementary material for: Transcriptomics and Transposon Mutagenesis Identify Multiple Mechanisms of Resistance to the FGFR Inhibitor AZD4547
Source: Oxford University Press journal article supplement (doi:10.1158/0008-5472.can-18-0757), 2018-08-16
Supplement: 00085472can180757-sup-198397_2_supp_4922890_pcgtgm.xlsx [file 00085472can180757-sup-198397_2_supp_4922890_pcgtgm.xlsx]

## Sheet: Sheet1
chrom	pos	ref	alt	sample	value	filter	symbol	canonical	transcript_id	consequence	sift	amino_acids	protein_position	sample_treatment
11	16875092	G	A	13SKA49	0/1	PASS	Egfr	YES	ENSMUST00000020329	stop_gained		W/*	477	Vehicle
10	128579044	A	AA	12SKA129	0/1	PASS	Erbb3	YES	ENSMUST00000082059	frameshift_variant		V/VX	411	AZD4547
7	130172827	T	A	15SKA209	1/1	PASS	Fgfr2	YES	ENSMUST00000122054	missense_variant	deleterious(0)	K/M	678	AZD4547
7	130172881	T	C	15SKA178	1/1	PASS	Fgfr2	YES	ENSMUST00000122054	missense_variant	deleterious(0)	K/R	660	AZD4547
7	130177835	G	A	12SKA121	0/1	PASS	Fgfr2	YES	ENSMUST00000122054	missense_variant	deleterious(0.03)	S/L	587	AZD4547
7	130177835	G	A	12SKA122	0/1	PASS	Fgfr2	YES	ENSMUST00000122054	missense_variant	deleterious(0.03)	S/L	587	AZD4547
7	130177844	T	C	15SKA207	1/1	PASS	Fgfr2	YES	ENSMUST00000122054	missense_variant	deleterious(0.01)	E/G	584	AZD4547
7	130177854	C	G	14SKA039	1/1	PASS	Fgfr2	YES	ENSMUST00000122054	missense_variant	deleterious(0)	V/L	581	AZD4547
7	130177854	C	G	14SKA74	1/1	PASS	Fgfr2	YES	ENSMUST00000122054	missense_variant	deleterious(0)	V/L	581	AZD4547
7	130177854	C	G	12SKA122	1/0	PASS	Fgfr2	YES	ENSMUST00000122054	missense_variant	deleterious(0)	V/L	581	AZD4547
7	130180391	T	G	14SKA121	1/1	PASS	Fgfr2	YES	ENSMUST00000122054	missense_variant	deleterious(0)	N/T	568	AZD4547
7	130180391	T	G	12SKA116	1/1	PASS	Fgfr2	YES	ENSMUST00000122054	missense_variant	deleterious(0)	N/T	568	AZD4547
7	130180392	T	G	13SKA116	1/1	PASS	Fgfr2	YES	ENSMUST00000122054	missense_variant	deleterious(0)	N/H	568	AZD4547
7	130180394	A	C	13SKA72	1/0	PASS	Fgfr2	YES	ENSMUST00000122054	missense_variant	deleterious(0)	I/S	567	AZD4547
7	130198465	A	T	13SKA4	1/1	PASS	Fgfr2	YES	ENSMUST00000122054	missense_variant	deleterious(0)	N/K	365	AZD4547
7	130198484	T	C	13SKA92	1/0	PASS	Fgfr2	YES	ENSMUST00000122054	missense_variant	deleterious(0)	Y/C	359	AZD4547
7	130201054	A	G	13SKA72	0/1	PASS	Fgfr2	YES	ENSMUST00000122054	missense_variant	deleterious(0)	W/R	309	AZD4547
7	130201059	A	C	15SKA192	1/1	PASS	Fgfr2	YES	ENSMUST00000122054	missense_variant	deleterious(0.01)	I/S	307	AZD4547
7	68004113	T	C	13SKA106	0/1	PASS	Igf1r	YES	ENSMUST00000005671	missense_variant	deleterious(0)	L/P	133	AZD4547
6	17492147	A	AA	13SKA71	0/1	PASS	Met	YES	ENSMUST00000115443	frameshift_variant		R/KX	303	Vehicle
6	115626725	T	TT	13SKA127	0/1	PASS	Raf1	YES	ENSMUST00000000451	frameshift_variant		E/EX	326	AZD4547
6	115626725	T	TT	14SKA46	0/1	PASS	Raf1	YES	ENSMUST00000000451	frameshift_variant		E/EX	326	AZD4547
6	115626725	T	TT	14SKA69	0/1	PASS	Raf1	YES	ENSMUST00000000451	frameshift_variant		E/EX	326	AZD4547
6	115626725	T	TT	13SKA57	0/1	PASS	Raf1	YES	ENSMUST00000000451	frameshift_variant		E/EX	326	Vehicle
6	115626725	T	TT	14SKA74	0/1	PASS	Raf1	YES	ENSMUST00000000451	frameshift_variant		E/EX	326	AZD4547
6	115626725	T	TT	15SKA120	0/1	PASS	Raf1	YES	ENSMUST00000000451	frameshift_variant		E/EX	326	Vehicle
6	115626725	T	TT	15SKA201	0/1	PASS	Raf1	YES	ENSMUST00000000451	frameshift_variant		E/EX	326	AZD4547
6	115626725	T	TT	15SKA209	0/1	PASS	Raf1	YES	ENSMUST00000000451	frameshift_variant		E/EX	326	AZD4547
6	115626725	T	TT	13SKA72	0/1	PASS	Raf1	YES	ENSMUST00000000451	frameshift_variant		E/EX	326	AZD4547
6	115626725	T	TT	13SKA92	0/1	PASS	Raf1	YES	ENSMUST00000000451	frameshift_variant		E/EX	326	AZD4547
6	115626725	T	TT	13SKA106	0/1	PASS	Raf1	YES	ENSMUST00000000451	frameshift_variant		E/EX	326	AZD4547
6	115626725	T	TT	12SKA116	0/1	PASS	Raf1	YES	ENSMUST00000000451	frameshift_variant		E/EX	326	AZD4547
6	115626725	T	TT	12SKA121	0/1	PASS	Raf1	YES	ENSMUST00000000451	frameshift_variant		E/EX	326	AZD4547
